# Supplementary material
Source: PubMed Central journal article supplement (PMC3478689)
Supplement: supp_dev.080671_DEV080671.pdf [file supp_dev.080671_DEV080671.pdf]

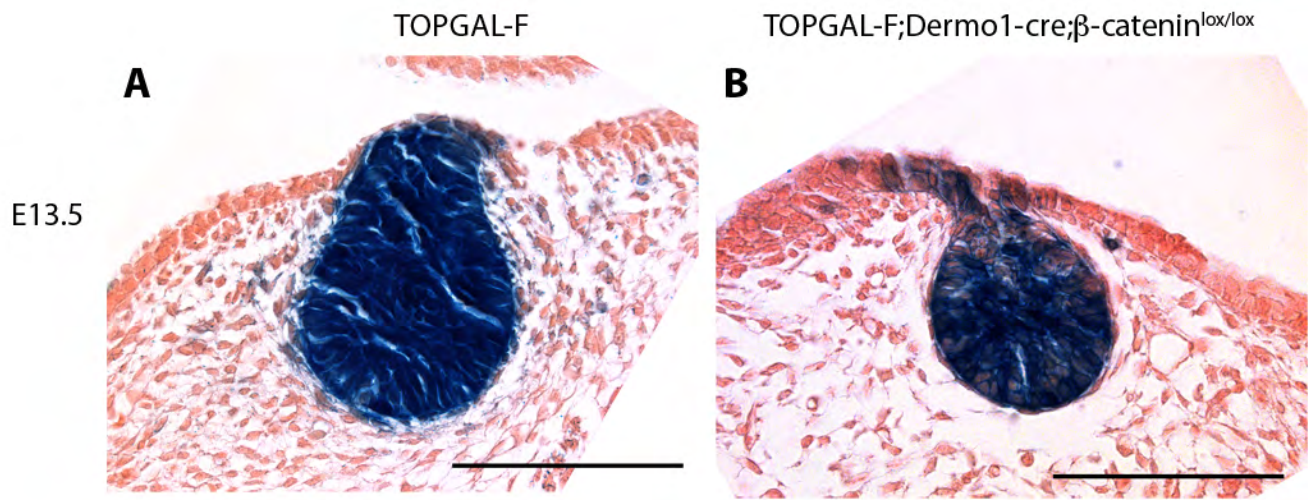

**Fig. S1. Epithelial Wnt signaling is unaffected by loss of mesenchymal  $\beta$ -catenin.** (A,B) Cross sections of mammary buds from E13.5 TOPGAL-F (A) and TOPGAL-F;Dermo1-cre; $\beta$ -catenin<sup>lox/lox</sup> (B) embryos demonstrating no change in epithelial Wnt signaling upon loss of mesenchymal  $\beta$ -catenin. Scale bars: 100  $\mu$ m.
